# Supplementary material for: Pd-Nanoparticles@layered double hydroxide/reduced graphene oxide (Pd NPs@LDH/rGO) nanocomposite catalysts for highly efficient green reduction of aromatic nitro compounds
Source: Royal Society of Chemistry journal article supplement (doi:10.1039/d1nj05377a), 2022-01-01
Supplement: d1nj05377a1.pdf [file d1nj05377a1.pdf]

## Supporting Information

### **Pd-Nanoparticles@Layered Double Hydroxide/ Reduced Graphene Oxide (Pd NPs@LDH/rGO) Nanocomposite Catalyst for Highly Efficient Green Reduction of Aromatic Nitro Compounds**

Dewan Azharul Islam and Himadri Acharya\*

Centre for Soft Matters, Department of Chemistry, Assam University,  
Silchar-788011, India. E-mail: himadriau@yahoo.co.in,  
himadri.acharya@aus.ac.in; Fax: +91 3842 270802; Tel: +91 3842 270848

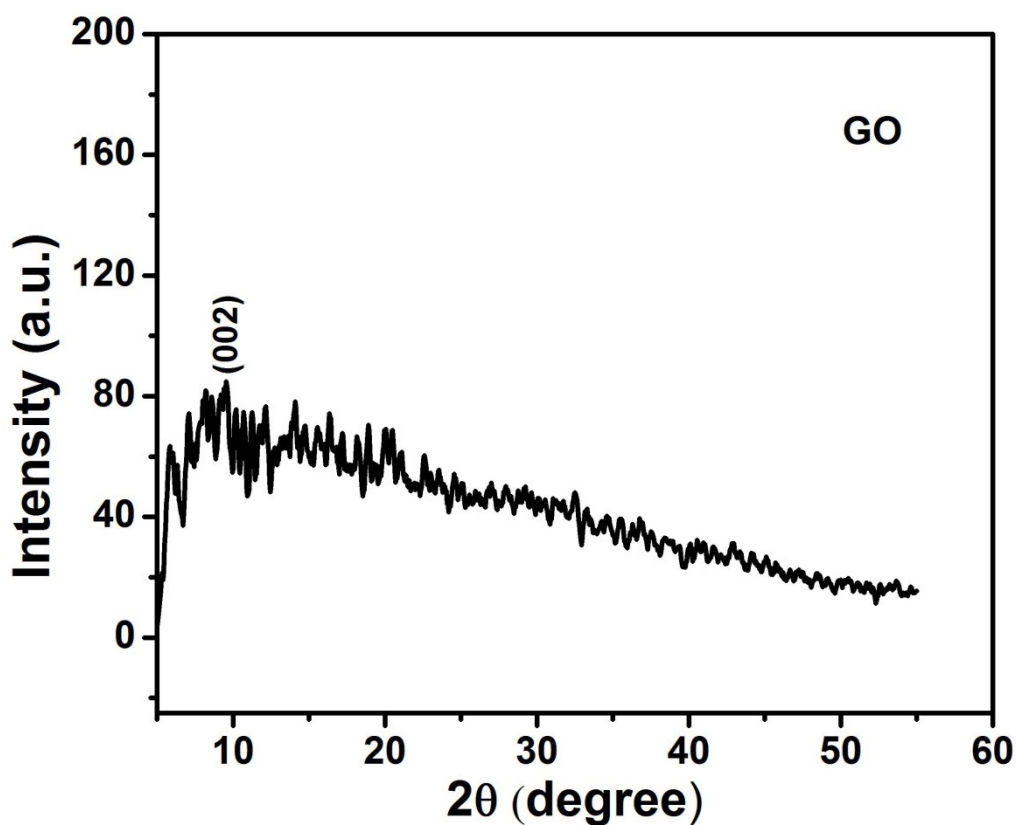

Fig. S1 Powder XRD pattern of exfoliated GO.

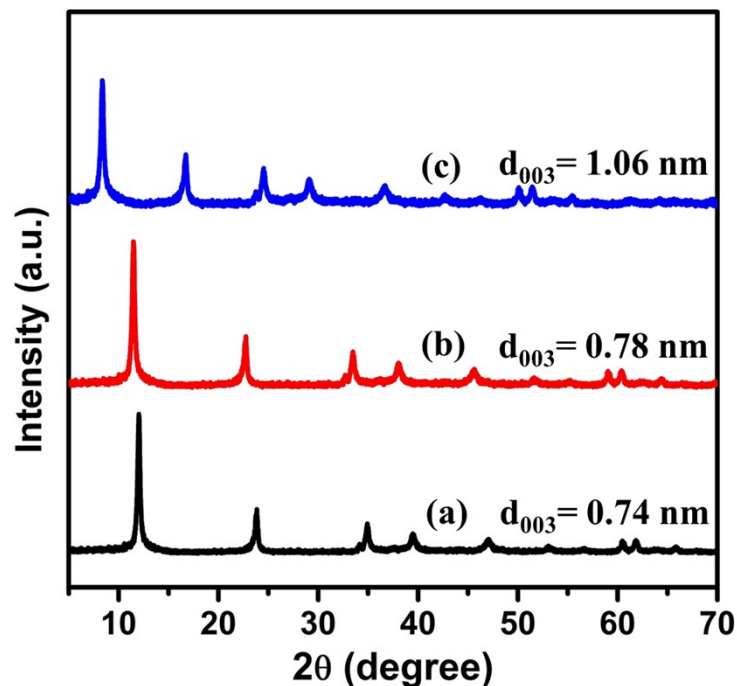

**Fig. S2** PXR D patterns of (a) ZnAl-(CO<sub>3</sub><sup>2-</sup>) LDH (d<sub>003</sub> = 0.74 nm), (b) ZnAl-(Cl<sup>-</sup>) LDH (d<sub>003</sub> = 0.78 nm) and (a) ZnAl-(PdCl<sub>4</sub><sup>2-</sup>) LDH (d<sub>003</sub> = 1.06 nm) supports successful intercalation of PdCl<sub>4</sub><sup>2-</sup> in the inter-gallery of LDH.

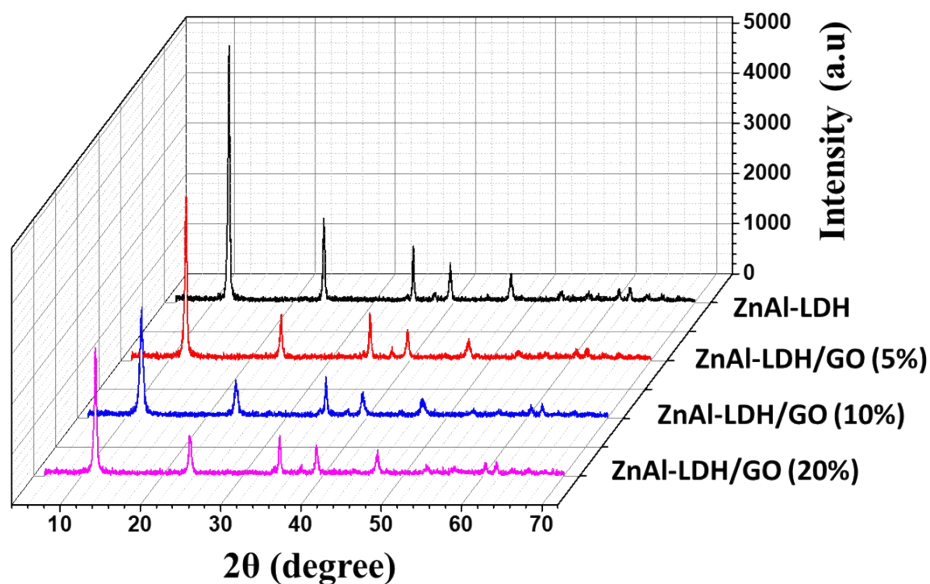

**Fig. S3** PXR D patterns of (a) ZnAl-LDH ( Avg. crystallite size= 34.8 nm), (b) ZnAl-LDH/GO (5%) (Avg. crystallite size= 27.7 nm), (c) ZnAl-LDH/GO (10%) (Avg. crystallite size= 18.2 nm) and (c) ZnAl-LDH/GO (20%) (Avg. crystallite size = 23.1 nm).

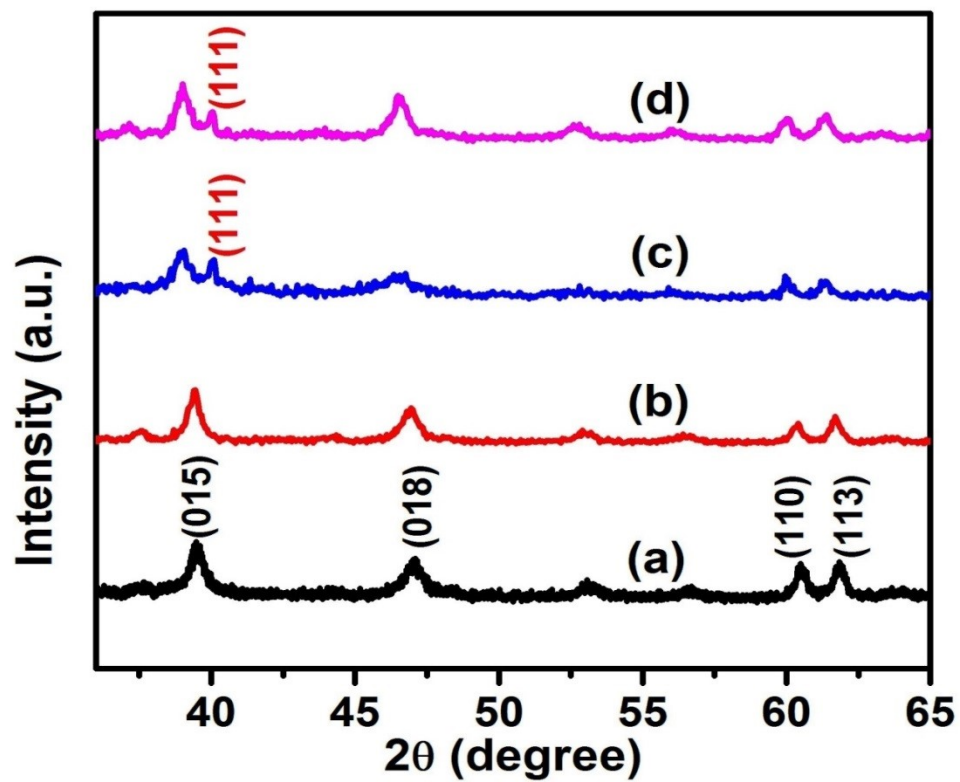

**Fig. S4** Wide angle PXRD patterns of (a) ZnAl-(CO<sub>3</sub><sup>2-</sup>) LDH, (b) ZnAl-(CO<sub>3</sub><sup>2-</sup>) LDH/GO, (c) Pd-NPs deposited ZnAl-LDH and (d) Pd-NPs deposited ZnAl-LDH/GO.

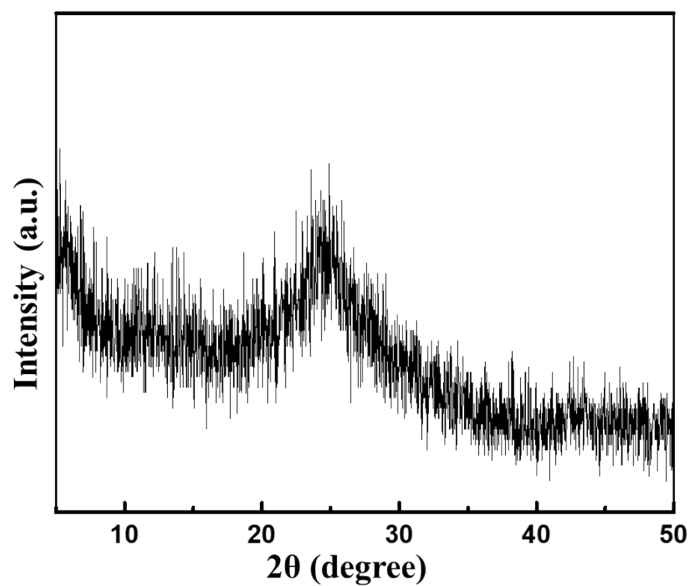

**Fig. S5** PXRD patterns of reduced graphene oxide (rGO)

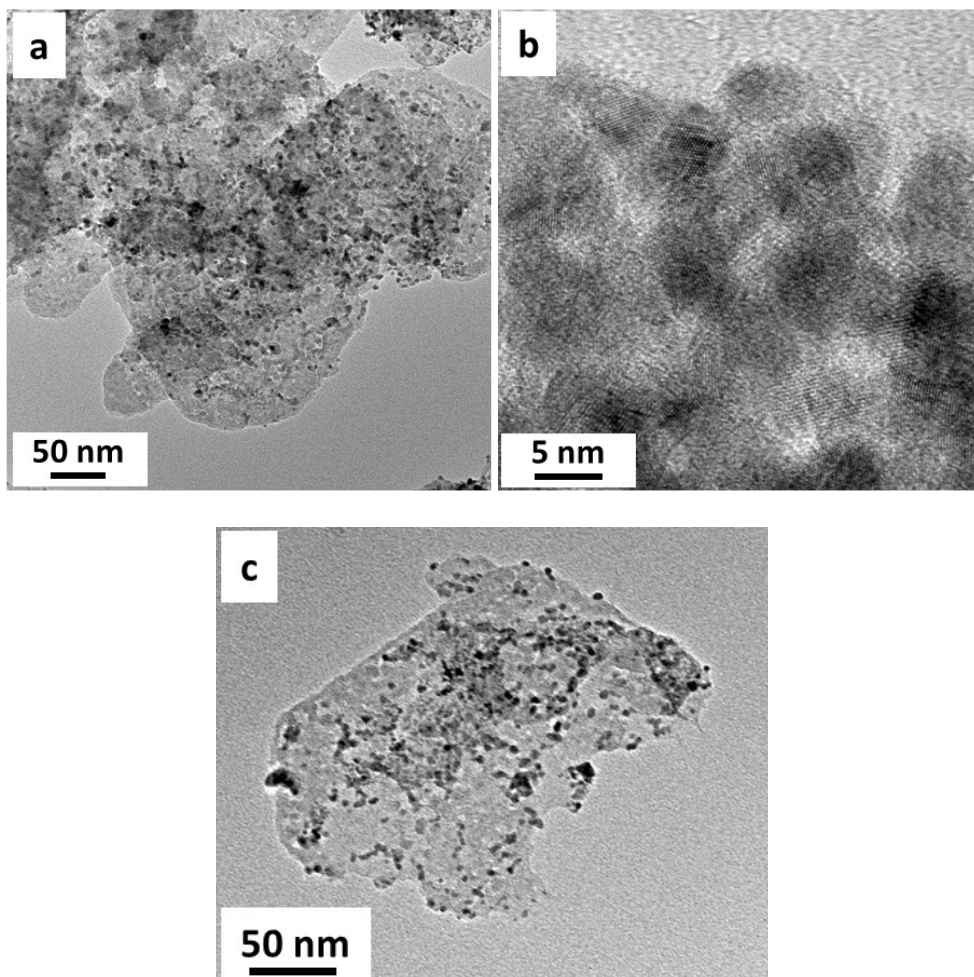

**Fig. S6** Representative TEM images of (a,b) Pd-NPs deposited on ZnAl-LDH/rGO with different magnifications (c) Pd-NPs deposited ZnAl-LDH.

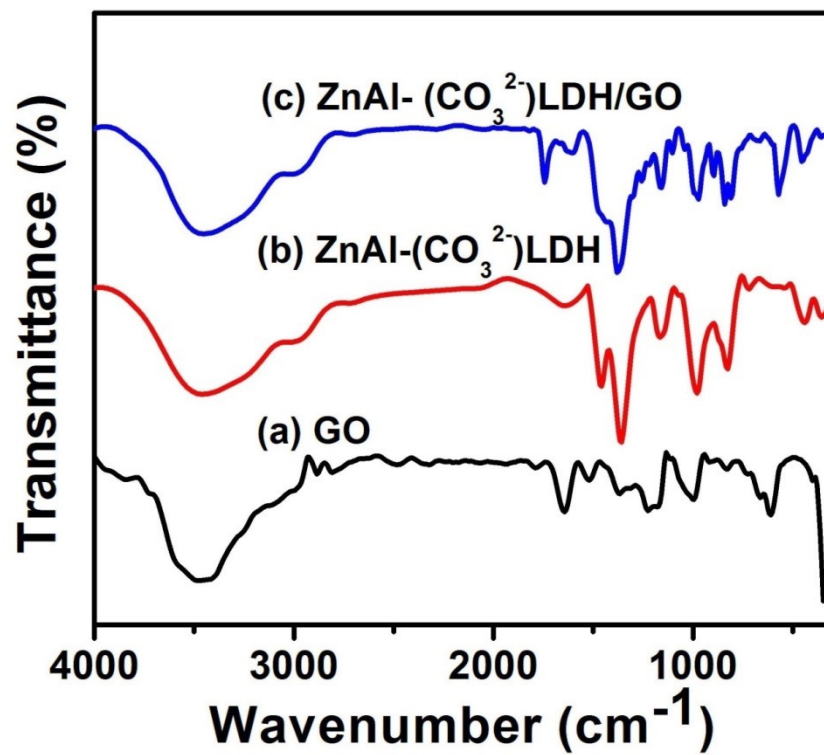

Fig. S7 FTIR spectra of GO, ZnAl-(CO<sub>3</sub><sup>2-</sup>) LDH and ZnAl-(CO<sub>3</sub><sup>2-</sup>) LDH/GO.

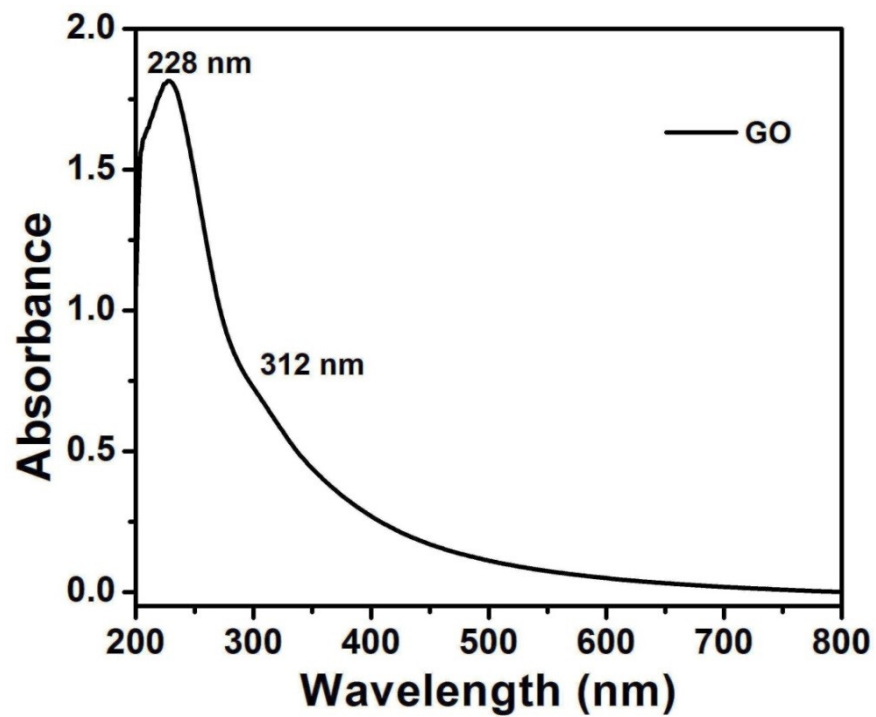

Fig. S8 UV-vis absorption spectrum of exfoliated GO.

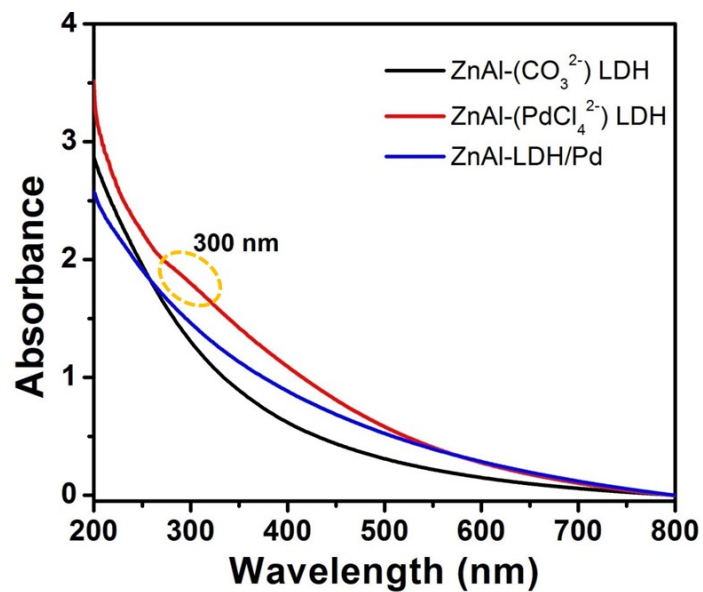

**Fig. S9** UV-vis absorption spectra of ZnAl-(CO<sub>3</sub><sup>2-</sup>) LDH, ZnAl-(PdCl<sub>4</sub><sup>2-</sup>) LDH and Pd-NPs deposited ZnAl-LDH.

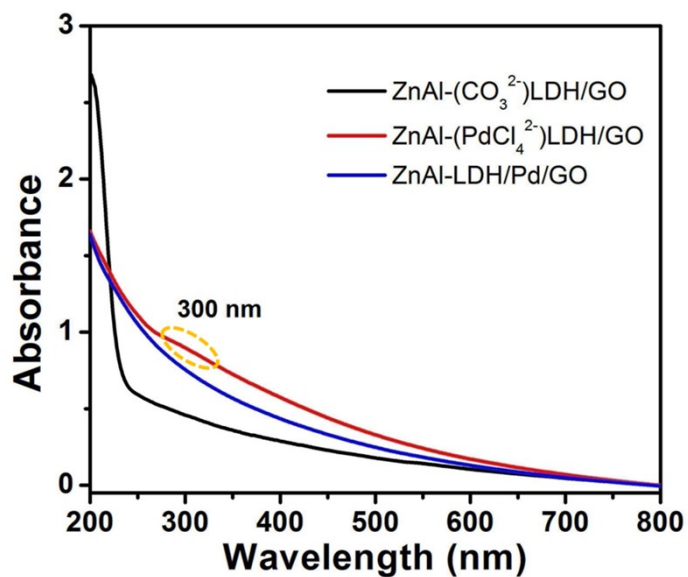

**Fig. S10** UV-vis absorption spectra of GO/ZnAl-(CO<sub>3</sub><sup>2-</sup>) LDH, ZnAl-(PdCl<sub>4</sub><sup>2-</sup>) LDH/GO and Pd-NPs deposited ZnAl-LDH/GO.

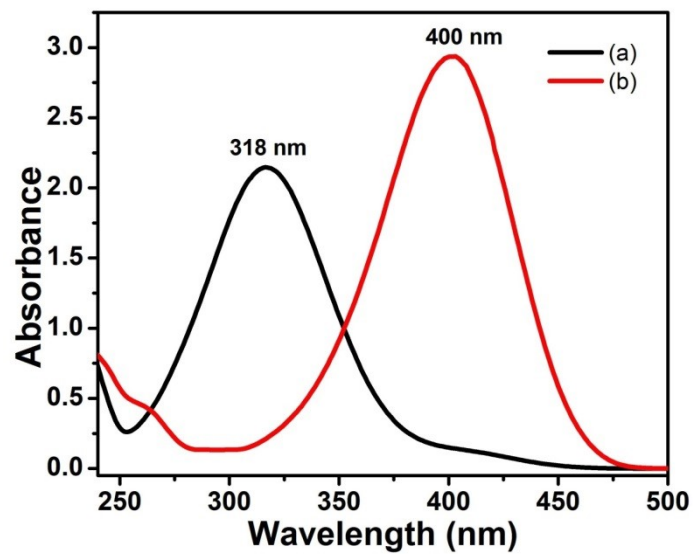

**Fig. S11** UV-vis absorption spectra of (a) 4-nitrophenol and (b) 4-nitrophenolate.

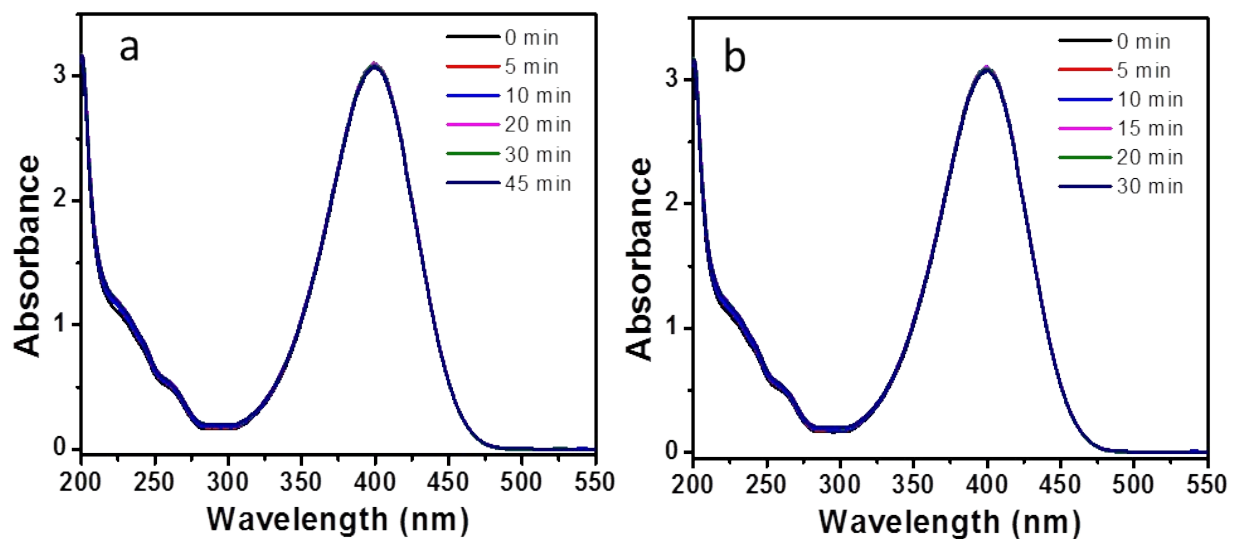

**Fig. S12** UV-vis absorption spectra during reduction of 4-nitrophenol by (a) NaBH<sub>4</sub> and (b) ZnAl-(CO<sub>3</sub><sup>2-</sup>) LDH catalyst.

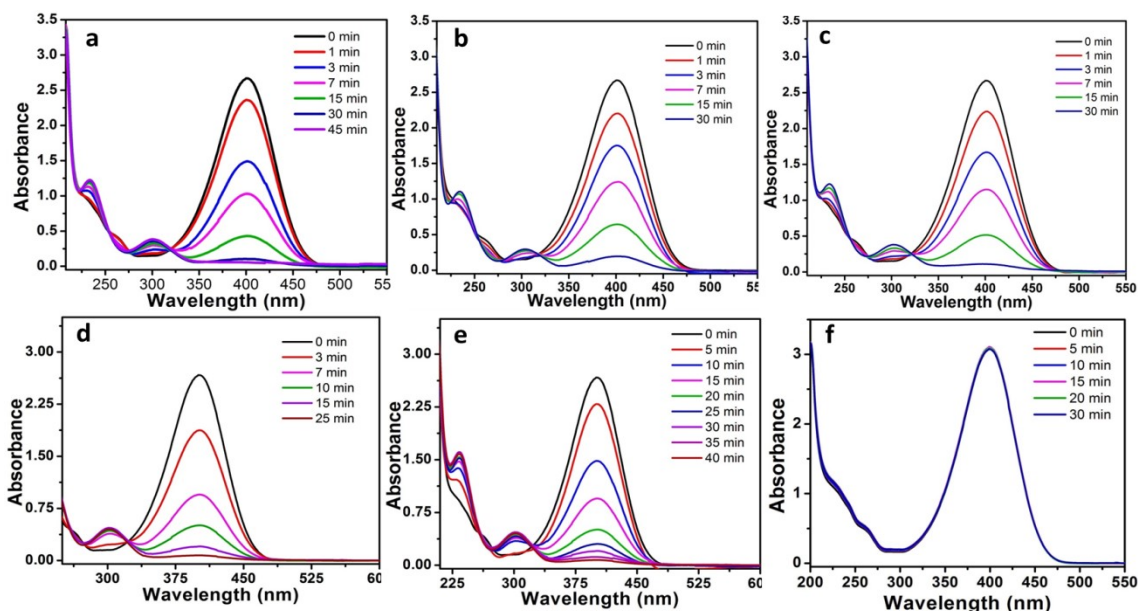

**Fig. S13** UV-vis absorption spectra during reduction of 4-nitrophenol by  $\text{NaBH}_4$  in presence of (a) ZnAl-(Pd-NPs) LDH, (b) ZnAl-(Pd-NPs) LDH/GO(5%), (c) ZnAl-(Pd-NPs) LDH/GO(10%), (d) ZnAl-(Pd-NPs) LDH/GO(20%), (e) Pd-NPs/GO and (f) ZnAl-( $\text{CO}_3^{2-}$ ) LDH as a catalyst.

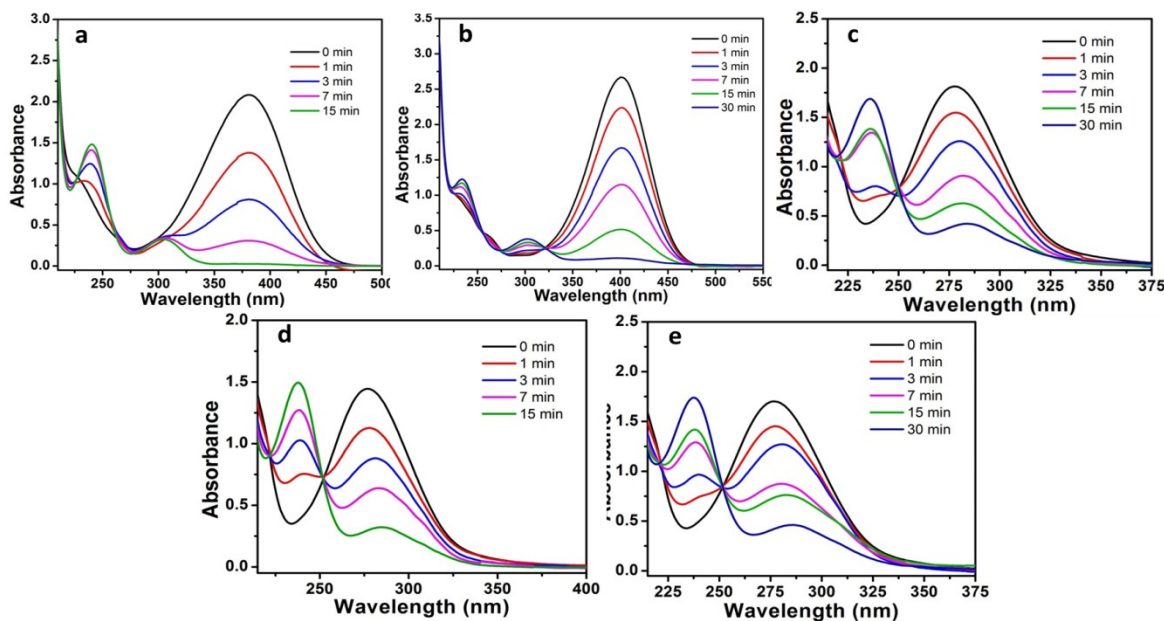

**Fig. S14** UV-vis absorption spectra during reduction of (a) 4-nitroaniline, (b) 4-nitrophenol, (c) 4-nitrobenzyl alcohol, (d) 4-nitroacetophenone and (e) 4-nitrobenzaldehyde by  $\text{NaBH}_4$  in presence ZnAl-(Pd-NPs) LDH/GO as a catalyst.



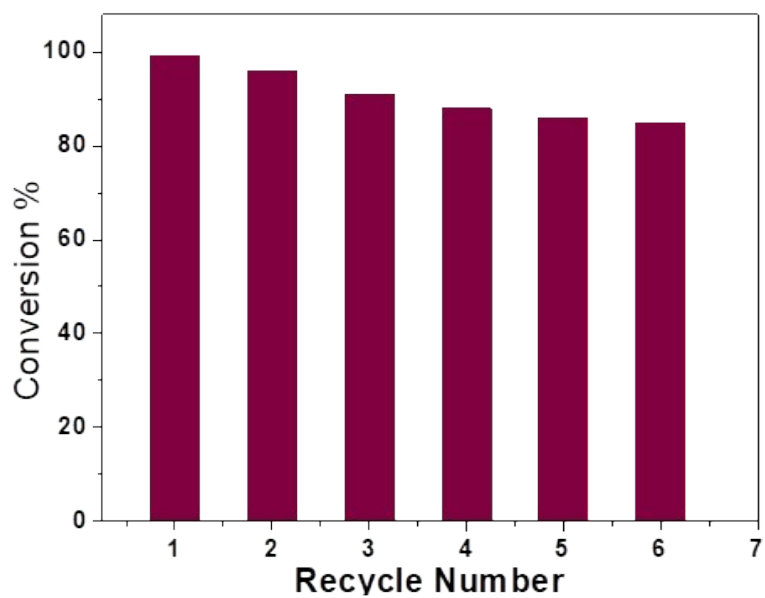

**Fig. S15** A plot of conversion (%) vs recycle number for the reduction of 4-nitroaniline over the same Pd NPs@LDH/rGO catalyst for six successive reuse cycles.

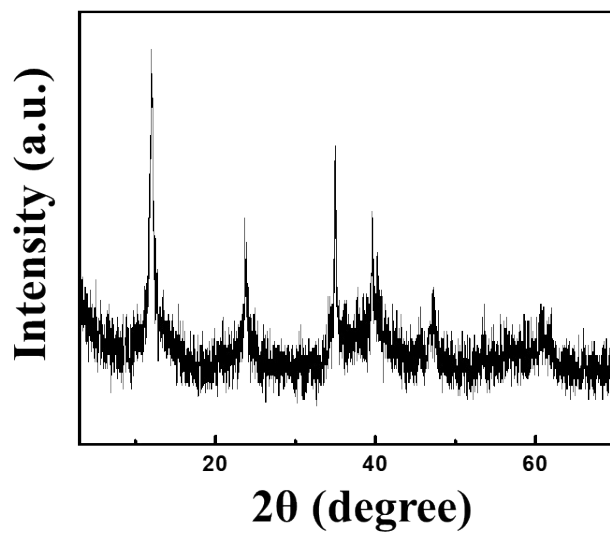

**Fig. S16** The postcatalytic PXRD pattern of reused Pd NPs@LDH/rGO catalyst after eight successive cycles.

Table-S1. Cell parameters of the synthesized compounds determined from powder X-ray diffraction.

| Compound                                    | Cell parameter,<br>c (nm) | Cell parameter,<br>a (nm) |
|---------------------------------------------|---------------------------|---------------------------|
| ZnAl(CO <sub>3</sub> <sup>2-</sup> ) LDH    | 2.22                      | 0.30                      |
| ZnAl-(Cl <sup>-</sup> ) LDHs                | 2.34                      | 0.30                      |
| ZnAl-(PdCl <sub>4</sub> <sup>2-</sup> ) LDH | 3.18                      | 0.36                      |
| ZnAl(CO <sub>3</sub> <sup>2-</sup> ) LDH/GO | 2.21                      | 0.30                      |
| Pd@LDH                                      | 2.20                      | 0.30                      |
| Pd@LDH/GO                                   | 2.21                      | 0.30                      |
